# Supplementary material
Source: HighWire-hosted journal article supplement (https://gh.bmj.com/content/6/12/e006691)
Supplement: inline-supplementary-material-5 [file inline-supplementary-material-5.pdf]

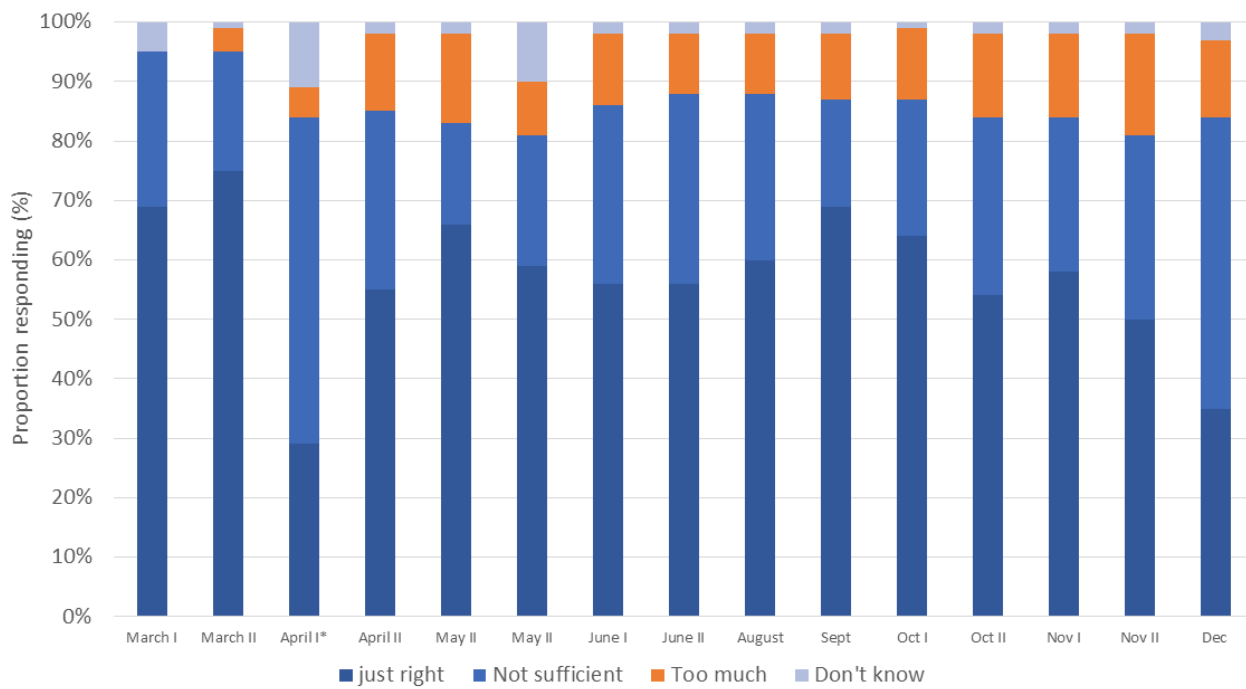

Web annex Figure 2: German polls of how the population views the Corona measures  
[https://www.forschungsgruppe.de/Umfragen/Politbarometer/Archiv/Politbarometer\\_2020/](https://www.forschungsgruppe.de/Umfragen/Politbarometer/Archiv/Politbarometer_2020/)
